# Supplementary material
Source: publisher figshare collection journal article supplement (https://karger.figshare.com/ndownloader/files/30842914)
Supplement: Supplementary file 1 [file 30842914]

**Table 5S(online suppl.):** Confounding Factors of absolute Time with high Signal Quality of Electrical Cardiometry

| **Factor** | **Statistical test** | **Statistics** | **p** |
| --- | --- | --- | --- |
| Age at first recorded value | Spearman’s correlation coefficient | rs=-0.459 | 0.032 |
| Number of recordings within first 6 hours | Spearman’s correlation coefficient | rs=0.620 | 0.002 |
| Antenatal Consent | Mann-Whitney U test | No(n=14)  28.3(21.7 to 31.6)  Yes(n=8)  36.7(23.7 to 39.0) | 0.110 |

rs: Spearman’s rho, otherwise results are presented as Median(IQR)
